# Supplementary material for: Fusing Sequence and Structural Knowledge by Heterogeneous Models to Accurately and Interpretively Predict Drug–Target Affinity
Source: MDPI journal article supplement (doi:10.3390/molecules28248005), 2023-12-08
Supplement: s1 [file s1]

# **Fusing sequence and structural knowledge by heterogeneous models to accurately and interpretively predict drug-target affinity**

**Xin Zeng <sup>1</sup>, Kai-Yang Zhong <sup>1</sup>, Bei Jiang <sup>2</sup> and Yi Li <sup>1\*</sup>**

1 College of Mathematics and Computer Science, Dali University, Dali 671003, China;  
xinzeng@dali.edu.cn (X.Z.); zkaiyang2022@163.com (K.-Y.Z.)

2 Yunnan Key Laboratory of Screening and Research on Anti-Pathogenic Plant Resources from  
Western Yunnan, Dali University, Dali 671000, China; jiangbei@dali.edu.cn

\* Correspondence: yili@dali.edu.cn

## Detailed summary of the dataset

In line with current competing methods [9–11], we utilized a benchmark dataset from the PDBbind database (2016 version) [36] to train, validate, and test our model. This dataset comprises 13283 high-resolution structures of drug-target complexes sourced from the Protein Data Bank (PDB, <https://www.rcsb.org>), along with experimental values of DTA, typically represented by  $pK_d$ . The training and testing datasets were constructed from the PDBbind database (2016 version), resulting in 12993 and 290 samples, respectively. To ensure the training efficiency of the model, the sequence length of targets was fixed at 2100 amino acids to cover 98.74% of samples (Supplementary Figure S1) of the training dataset. A total of four samples were excluded due to processing issues with the Biopython package [37]. Consequently, the training dataset comprises 12823 samples, while the testing dataset has 289 samples. The maximum length of drug SMILES (Simplified Molecular Input Line Entry System) [20] was chosen as the fixed length. Sequences of targets or drug SMILES shorter than their fixed lengths were zero-padded.

### Supplementary Figure S1

A sequence length distribution statistic chart of targets in 2016 version dataset of PDBbind database.

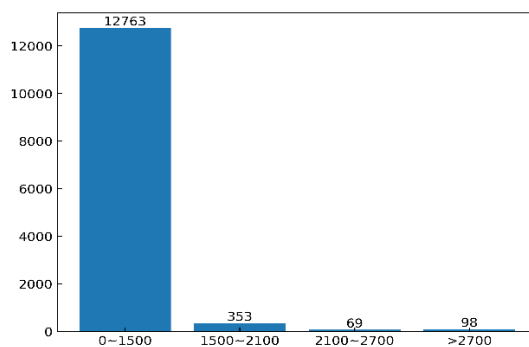

## Supplementary Table S1

The physical-chemical properties of amino acids are often also employed for sequence feature of proteins, so we selected 24 physical-chemical properties of amino acids. The data presented in Table S1 is derived from literature [38], which has been compiled from two primary data sources, [http://en.wikipedia.org/wiki/Amino acid](http://en.wikipedia.org/wiki/Amino_acid) and [http://en.wikipedia.org/wiki/Proteinogenic amino acid](http://en.wikipedia.org/wiki/Proteinogenic_amino_acid). All properties listed in Table S1 represent the actual numerical values.

24 physical-chemical properties of amino acids in proteins

| amino_acid | hydropathy | charge | polarity | volume | count | strength | mjenergy | kf1   | kf2   | kf3   | kf4   | kf5   | kf6   | kf7   | kf8   | kf9   | kf10  | rim   | surface | turn | alpha | beta | core  | disorder |
|------------|------------|--------|----------|--------|-------|----------|----------|-------|-------|-------|-------|-------|-------|-------|-------|-------|-------|-------|---------|------|-------|------|-------|----------|
| A          | 1.8        | 0      | 0        | 67     | 1     | 0        | -2.8455  | -1.56 | -1.67 | -0.97 | -0.27 | -0.93 | -0.78 | -0.2  | -0.08 | 0.21  | -0.48 | 0.047 | 0.065   | 0.78 | 1.29  | 0.9  | 0.049 | 0        |
| C          | 2.5        | 0      | 0        | 86     | 1     | 1        | -3.782   | 0.12  | -0.89 | 0.45  | -1.05 | -0.71 | 2.41  | 1.52  | -0.69 | 1.13  | 1.1   | 0.015 | 0.015   | 0.8  | 1.11  | 0.74 | 0.02  | -1       |
| D          | -3.5       | -1     | 1        | 91     | 1     | 0        | -2.116   | 0.58  | -0.22 | -1.58 | 0.81  | -0.92 | 0.15  | -1.52 | 0.47  | 0.76  | 0.7   | 0.071 | 0.074   | 1.41 | 1.04  | 0.72 | 0.051 | 1        |
| E          | -3.5       | -1     | 1        | 109    | 1     | 0        | -2.141   | -1.45 | 0.19  | -1.61 | 1.17  | -1.31 | 0.4   | 0.04  | 0.38  | -0.35 | -0.12 | 0.094 | 0.089   | 1    | 1.44  | 0.75 | 0.051 | 1        |
| F          | 2.8        | 0      | 0        | 135    | 1     | 1        | -5.017   | -0.21 | 0.98  | -0.36 | -1.43 | 0.22  | -0.81 | 0.67  | 1.1   | 1.71  | -0.44 | 0.021 | 0.029   | 0.58 | 1.07  | 1.32 | 0.051 | -1       |
| G          | -0.4       | 0      | 0        | 48     | 1     | 0        | -2.499   | 1.46  | -1.96 | -0.23 | -0.16 | 0.1   | -0.11 | 1.32  | 2.36  | -1.66 | 0.46  | 0.071 | 0.07    | 1.64 | 0.56  | 0.92 | 0.06  | 1        |
| H          | -3.2       | 1      | 1        | 118    | 1     | 0        | -2.927   | -0.41 | 0.52  | -0.28 | 0.28  | 1.61  | 1.01  | -1.85 | 0.47  | 1.13  | 1.63  | 0.022 | 0.025   | 0.69 | 1.22  | 1.08 | 0.034 | -1       |
| I          | 4.5        | 0      | 0        | 124    | 1     | 1        | -4.641   | -0.73 | -0.16 | 1.79  | -0.77 | -0.54 | 0.03  | -0.83 | 0.51  | 0.66  | -1.78 | 0.032 | 0.035   | 0.51 | 0.97  | 1.45 | 0.047 | -1       |
| K          | -3.9       | 1      | 1        | 135    | 1     | 0        | -1.789   | -0.34 | 0.82  | -0.23 | 1.7   | 1.54  | -1.62 | 1.15  | -0.08 | -0.48 | 0.6   | 0.105 | 0.08    | 0.96 | 1.23  | 0.77 | 0.05  | 1        |
| L          | 3.8        | 0      | 0        | 124    | 1     | 1        | -5.023   | -1.04 | 0     | -0.24 | -1.1  | -0.55 | -2.05 | 0.96  | -0.76 | 0.45  | 0.93  | 0.052 | 0.063   | 0.59 | 1.3   | 1.02 | 0.078 | -1       |
| M          | 1.9        | 0      | 0        | 124    | 1     | 1        | -4.1915  | -1.4  | 0.18  | -0.42 | -0.73 | 2     | 1.52  | 0.26  | 0.11  | -1.27 | 0.27  | 0.017 | 0.016   | 0.39 | 1.47  | 0.97 | 0.027 | 1        |
| N          | -3.5       | 0      | 1        | 96     | 1     | 0        | -2.349   | 1.14  | -0.07 | -0.12 | 0.81  | 0.18  | 0.37  | -0.09 | 1.23  | 1.1   | -1.73 | 0.062 | 0.053   | 1.28 | 0.9   | 0.76 | 0.058 | 1        |
| P          | -1.6       | 0      | 0        | 90     | 1     | 0        | -2.443   | 2.06  | -0.33 | -1.15 | -0.75 | 0.88  | -0.45 | 0.3   | -2.3  | 0.74  | -0.28 | 0.052 | 0.054   | 1.91 | 0.52  | 0.64 | 0.051 | 1        |
| Q          | -3.5       | 0      | 1        | 114    | 1     | 0        | -2.2505  | -0.47 | 0.24  | 0.07  | 1.1   | 1.1   | 0.59  | 0.84  | -0.71 | -0.03 | -2.33 | 0.053 | 0.051   | 0.97 | 1.27  | 0.8  | 0.051 | 1        |
| R          | -4.5       | 1      | 1        | 148    | 1     | 0        | -2.402   | 0.22  | 1.27  | 1.37  | 1.87  | -1.7  | 0.46  | 0.92  | -0.39 | 0.23  | 0.93  | 0.068 | 0.059   | 0.88 | 0.96  | 0.99 | 0.066 | 1        |
| S          | -0.8       | 0      | 1        | 73     | 1     | 0        | -2.308   | 0.81  | -1.08 | 0.16  | 0.42  | -0.21 | -0.43 | -1.89 | -1.15 | -0.97 | -0.23 | 0.072 | 0.071   | 1.33 | 0.82  | 0.95 | 0.057 | 1        |
| T          | -0.7       | 0      | 1        | 93     | 1     | 0        | -2.6145  | 0.26  | -0.7  | 1.21  | 0.63  | -0.1  | 0.21  | 0.24  | -1.15 | -0.56 | 0.19  | 0.064 | 0.065   | 1.03 | 0.82  | 1.21 | 0.064 | 0        |
| V          | 4.2        | 0      | 0        | 105    | 1     | 1        | -4.093   | -0.74 | -0.71 | 2.04  | -0.4  | 0.5   | -0.81 | -1.07 | 0.06  | -0.46 | 0.65  | 0.048 | 0.048   | 0.47 | 0.91  | 1.49 | 0.049 | -1       |
| W          | -0.9       | 0      | 0        | 163    | 1     | 1        | -4.1375  | 0.3   | 2.1   | -0.72 | -1.57 | -1.16 | 0.57  | -0.48 | -0.4  | -2.3  | -0.6  | 0.007 | 0.012   | 0.75 | 0.99  | 1.14 | 0.022 | -1       |
| Y          | -1.3       | 0      | 1        | 141    | 1     | 1        | -3.7505  | 1.38  | 1.48  | 0.8   | -0.56 | 0     | -0.68 | -0.31 | 1.03  | -0.05 | 0.53  | 0.032 | 0.033   | 1.05 | 0.72  | 1.25 | 0.07  | -1       |

## Supplementary Table S2

The physical-chemical properties of atoms in drugs also have a large impact on the prediction performance of S2DTA, so we select 9 physical-chemical properties of atoms.

9 physical-chemical properties of atoms in drugs

| Atom Property | Atomic number | Atomic mass | Electronegativity (Pauling) | Electronegativity (Allen) | Atomic radius (empirical) | Atomic radius (calculated) | Atomic radius (vanderWaals) | Ionization Energy (eV) | Number of Outermost Electrons |
|---------------|---------------|-------------|-----------------------------|---------------------------|---------------------------|----------------------------|-----------------------------|------------------------|-------------------------------|
| Carbon(C)     | 6             | 12.01       | 2.55                        | 2.54                      | 70                        | 67                         | 170                         | 11.26                  | 4                             |
| Hydrogen(H)   | 1             | 1.008       | 2.20                        | 2.3                       | 25                        | 53                         | 120                         | -13.60                 | 1                             |
| Oxygen(O)     | 8             | 15.99       | 3.44                        | 3.61                      | 60                        | 48                         | 152                         | 13.62                  | 6                             |
| Nitrogen(N)   | 7             | 14.01       | 3.04                        | 3.07                      | 65                        | 56                         | 155                         | 14.53                  | 5                             |
| Fluorine(F)   | 9             | 18.99       | 3.98                        | 4.19                      | 50                        | 42                         | 147                         | 17.42                  | 7                             |
| Sulfur(S)     | 16            | 32.06       | 2.58                        | 2.59                      | 100                       | 88                         | 180                         | 10.36                  | 6                             |
| Phosphorus(P) | 15            | 30.97       | 2.19                        | 2.25                      | 100                       | 98                         | 180                         | 10.49                  | 5                             |
| Iodine(I)     | 53            | 126.90      | 2.66                        | 2.36                      | 140                       | 115                        | 198                         | 10.45                  | 7                             |
| Chlorine(Cl)  | 17            | 35.45       | 3.16                        | 2.87                      | 100                       | 79                         | 175                         | 12.97                  | 7                             |
| Arsenic(As)   | 33            | 74.92       | 2.18                        | 2.21                      | 115                       | 114                        | 185                         | 9.79                   | 5                             |
| Selenium(Se)  | 34            | 78.96       | 2.55                        | 2.42                      | 115                       | 103                        | 190                         | 9.75                   | 6                             |
| Bromine(Br)   | 35            | 79.90       | 2.96                        | 2.69                      | 115                       | 94                         | 185                         | 11.81                  | 7                             |
| Boron(B)      | 5             | 10.81       | 2.04                        | 2.05                      | 85                        | 87                         | 192                         | 8.30                   | 3                             |
| Platinum(Pt)  | 78            | 195.09      | 2.28                        | --(2.28)                  | 135                       | 177                        | 175                         | 8.96                   | 2                             |
| Vanadium(V)   | 23            | 50.94       | 1.63                        | 1.53                      | 135                       | 171                        | --(172)                     | 6.83                   | 5                             |
| Iron(Fe)      | 26            | 55.85       | 1.83                        | 1.80                      | 140                       | 156                        | --(172)                     | 7.90                   | 2                             |
| Mercury(Hg)   | 80            | 200.59      | 2.00                        | --(2.28)                  | 150                       | 171                        | 155                         | 10.44                  | 2                             |
| Rhodium(Rh)   | 45            | 102.91      | 2.28                        | 1.56                      | 135                       | 173                        | --(172)                     | 7.46                   | 2                             |
| Magnesium(Mg) | 12            | 24.31       | 1.31                        | 1.29                      | 150                       | 145                        | 173                         | 7.65                   | 2                             |
| Beryllium(Be) | 4             | 9.01        | 1.57                        | 1.58                      | 105                       | 112                        | 153                         | 9.32                   | 2                             |
| Silicon(Si)   | 14            | 28.09       | 1.90                        | 1.92                      | 110                       | 111                        | 210                         | 8.15                   | 4                             |
| Ruthenium(Ru) | 44            | 101.07      | 2.2                         | 1.54                      | 130                       | 178                        | --(172)                     | 7.36                   | 1                             |
| Antimony(Sb)  | 51            | 121.75      | 2.05                        | 1.98                      | 145                       | 133                        | 206                         | 8.61                   | 5                             |
| Copper(Cu)    | 29            | 63.55       | 1.90                        | 1.85                      | 135                       | 145                        | 140                         | 7.73                   | 1                             |
| Rhenium(Re)   | 75            | 186.21      | 1.9                         | --(2.28)                  | 135                       | 188                        | --(172)                     | 7.83                   | 2                             |
| Iridium(Ir)   | 77            | 192.22      | 2.2                         | --(2.28)                  | 135                       | 180                        | --(172)                     | 8.97                   | 1                             |
| Osmium(Os)    | 76            | 190.2       | 2.2                         | --(2.28)                  | 130                       | 185                        | --(172)                     | 8.44                   | 2                             |

Note: some property values in Supplementary Table S2 are missing (--), we replace the missing values by averaging all occurrences (data in brackets) of this property.
